# Supplementary material
Source: PubMed Central journal article supplement (PMC2517967)
Supplement: 11606_2008_604_MOESM1_ESM.pdf [file 11606_2008_604_MOESM1_ESM.pdf]

**Enrollment**

Your progress through the survey is shown at left. If you get interrupted you can resume using the link in your email. ***Thank you for participating!***

Have you completed an **endocrinology** rotation?

- No
- Yes

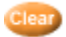

Have you completed a **cardiology** rotation?

- No
- Yes

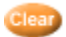

| For patients with diabetes, <i>how confident</i> are you in <i>your own ability</i> to... | 1. Not at all confident<br>2. Somewhat confident<br>3. Moderately confident<br>4. Very confident<br>5. Extremely confident |                       |                       |                       |                       |
|-------------------------------------------------------------------------------------------|----------------------------------------------------------------------------------------------------------------------------|-----------------------|-----------------------|-----------------------|-----------------------|
|                                                                                           | 1                                                                                                                          | 2                     | 3                     | 4                     | 5                     |
| manage patients' blood pressures?                                                         | <input type="radio"/>                                                                                                      | <input type="radio"/> | <input type="radio"/> | <input type="radio"/> | <input type="radio"/> |
| manage patients' lipid levels?                                                            | <input type="radio"/>                                                                                                      | <input type="radio"/> | <input type="radio"/> | <input type="radio"/> | <input type="radio"/> |
| achieve glycemic control?                                                                 | <input type="radio"/>                                                                                                      | <input type="radio"/> | <input type="radio"/> | <input type="radio"/> | <input type="radio"/> |
| convince patients to take the medications they need?                                      | <input type="radio"/>                                                                                                      | <input type="radio"/> | <input type="radio"/> | <input type="radio"/> | <input type="radio"/> |
| instruct patients about diet?                                                             | <input type="radio"/>                                                                                                      | <input type="radio"/> | <input type="radio"/> | <input type="radio"/> | <input type="radio"/> |
| help patients make changes in their diet that you have recommended?                       | <input type="radio"/>                                                                                                      | <input type="radio"/> | <input type="radio"/> | <input type="radio"/> | <input type="radio"/> |
| instruct patients about regular exercise?                                                 | <input type="radio"/>                                                                                                      | <input type="radio"/> | <input type="radio"/> | <input type="radio"/> | <input type="radio"/> |
| help patients make changes in their exercise that you have recommended?                   | <input type="radio"/>                                                                                                      | <input type="radio"/> | <input type="radio"/> | <input type="radio"/> | <input type="radio"/> |
| provide effective overall diabetes care?                                                  | <input type="radio"/>                                                                                                      | <input type="radio"/> | <input type="radio"/> | <input type="radio"/> | <input type="radio"/> |

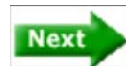

| How much do the following barriers limit your success in managing patients with diabetes? | 1. Does not limit<br>5. Limits a great deal |                       |                       |                       |                       |
|-------------------------------------------------------------------------------------------|---------------------------------------------|-----------------------|-----------------------|-----------------------|-----------------------|
|                                                                                           | 1                                           | 2                     | 3                     | 4                     | 5                     |
| Patients are unable to exercise regularly                                                 | <input type="radio"/>                       | <input type="radio"/> | <input type="radio"/> | <input type="radio"/> | <input type="radio"/> |
| Patients are unable to follow a diet                                                      | <input type="radio"/>                       | <input type="radio"/> | <input type="radio"/> | <input type="radio"/> | <input type="radio"/> |
| Patients are unable to follow medication regimens                                         | <input type="radio"/>                       | <input type="radio"/> | <input type="radio"/> | <input type="radio"/> | <input type="radio"/> |
| Patients cannot afford their medications                                                  | <input type="radio"/>                       | <input type="radio"/> | <input type="radio"/> | <input type="radio"/> | <input type="radio"/> |
| Patients cannot afford to do home glucose monitoring                                      | <input type="radio"/>                       | <input type="radio"/> | <input type="radio"/> | <input type="radio"/> | <input type="radio"/> |

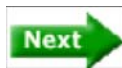

Page 3: EBM skills

The questions below are based on the following hypothetical trial.

A new anti-inflammatory drug is evaluated in a clinical trial among patients at risk for myocardial infarction. In the trial, 1000 patients are randomized to take the drug and 1000 are randomized to take a placebo. Over 4 years, myocardial infarctions occur among 30 patients taking the drug and 50 patients taking placebo.

Please enter your best estimate for each question below. Enter "-1" if you don't have enough information to calculate the answer. Leave the question blank **only** if you don't know how to make an estimate.

What was the percent relative risk reduction (RRR) for myocardial infarction with the new drug compared with placebo?

What was the percent absolute risk reduction (ARR) for myocardial infarction with the new drug compared with placebo?

Among the study population, what was the number needed to treat (NNT) with the new drug, vs. placebo, to prevent 1 additional myocardial infarction over 4 years?

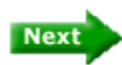

Page 4: Computers

How sophisticated a computer user do you consider yourself?

- Very sophisticated
- Sophisticated
- Neither sophisticated nor unsophisticated
- Unsophisticated
- Very unsophisticated

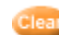

| Please rate your agreement with each of the statements below:      | Strongly Disagree     | Disagree              | Neutral               | Agree                 | Strongly Agree        |
|--------------------------------------------------------------------|-----------------------|-----------------------|-----------------------|-----------------------|-----------------------|
| Computers increase the quality of my work                          | <input type="radio"/> |
| Computers increase my efficiency at work                           | <input type="radio"/> |
| Computer use is a necessity in my work                             | <input type="radio"/> |
| I could be more effective at work if more things were computerized | <input type="radio"/> |
| Computers make me uneasy                                           | <input type="radio"/> |
| I like working with computers                                      | <input type="radio"/> |
| I have more negative than positive experiences with computers      | <input type="radio"/> |
| Learning about computers is too time consuming                     | <input type="radio"/> |

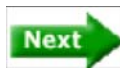

---

Page 5: About You

---

Gender:

- Female  
 Male

Clear

Age (years):

***The following questions will be used only to check the diversity of our participants.***

Do you consider yourself Hispanic or Latino/Latina?

- No  
 Yes

Clear

Which categories best describe your race?

- American Indian or Alaska Native  
 Asian  
 Black or African American  
 Native Hawaiian or Other Pacific Islander  
 White

If none of the race options above apply, please enter your race here:

Done
